# Supplementary material for: Size controlled gold tip growth onto II–VI nanorods
Source: Royal Society of Chemistry journal article supplement (doi:10.1039/c0jm01689f), 2010-01-01
Supplement: c0jm01689f.pdf [file c0jm01689f.pdf]

### Electronic Supplementary Information (ESI)

|                                  | Name  | Position | % Conc |
|----------------------------------|-------|----------|--------|
| Increasing gold<br>tip size<br>↓ | Cd 3d | 404.4    | 33.75  |
|                                  | Au 4f | 83.4     | 67.25  |
|                                  | Cd 3d | 404.3    | 28.5   |
|                                  | Au 4f | 83.4     | 71.4   |
|                                  | Cd 3d | 404.2    | 22.2   |
|                                  | Au 4f | 83.2     | 77.9   |

**Table S1.** XPS relative concentrations of Cd:Au. As the gold tip increases the relative intensity of Cd:Au decreases

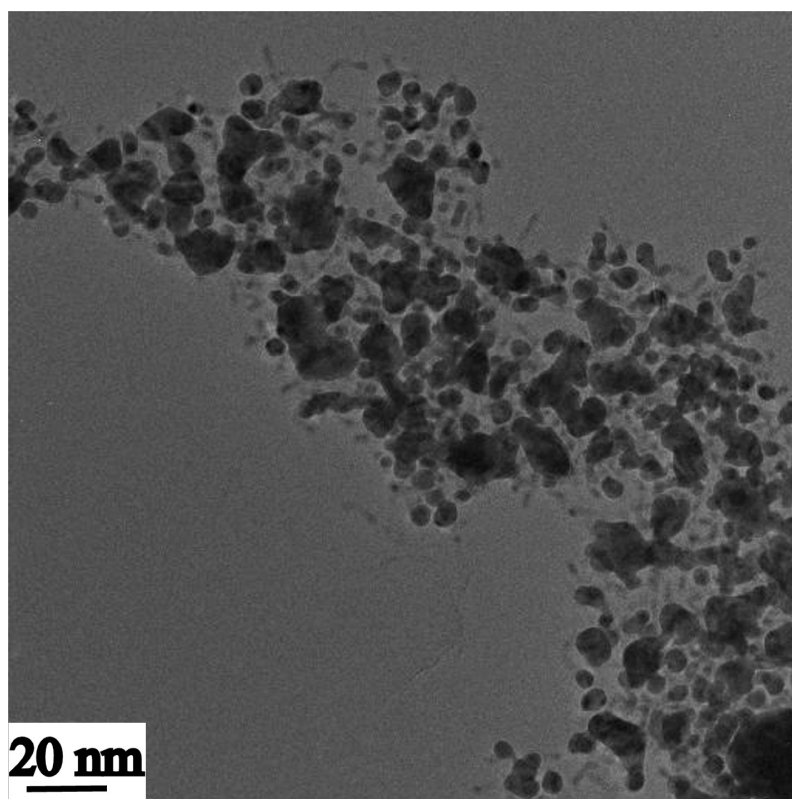

**Fig. S1.** Gold growth onto CdTe nanorods using 0.0086 mmol AuCl

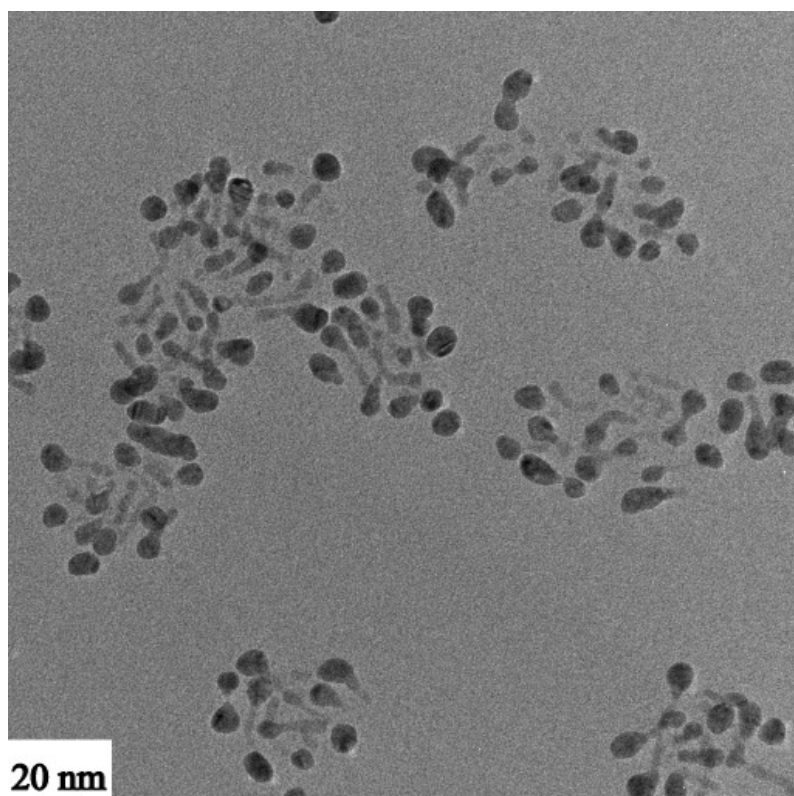

**Fig. S2.** TEM image of CdTe nanorods subjected to 0.66 mmol AuCl<sub>3</sub>. The nanorod tip size is approximately 20 nm

| Material | $A$ | $\Delta A$ | $p$  | $\Delta p$ | $c_0$  | $\Delta c_0$ |
|----------|-----|------------|------|------------|--------|--------------|
| CdS      | 41  | 3          | 0.44 | 0.06       | 0.008  | 0.002        |
| CdSe     | 250 | 30         | 0.91 | 0.09       | 0.005  | 0.002        |
| CdTe     | 241 | 20         | 0.59 | 0.05       | 0.0077 | 0.0009       |

**Table S2.** Fitting parameters used for the model

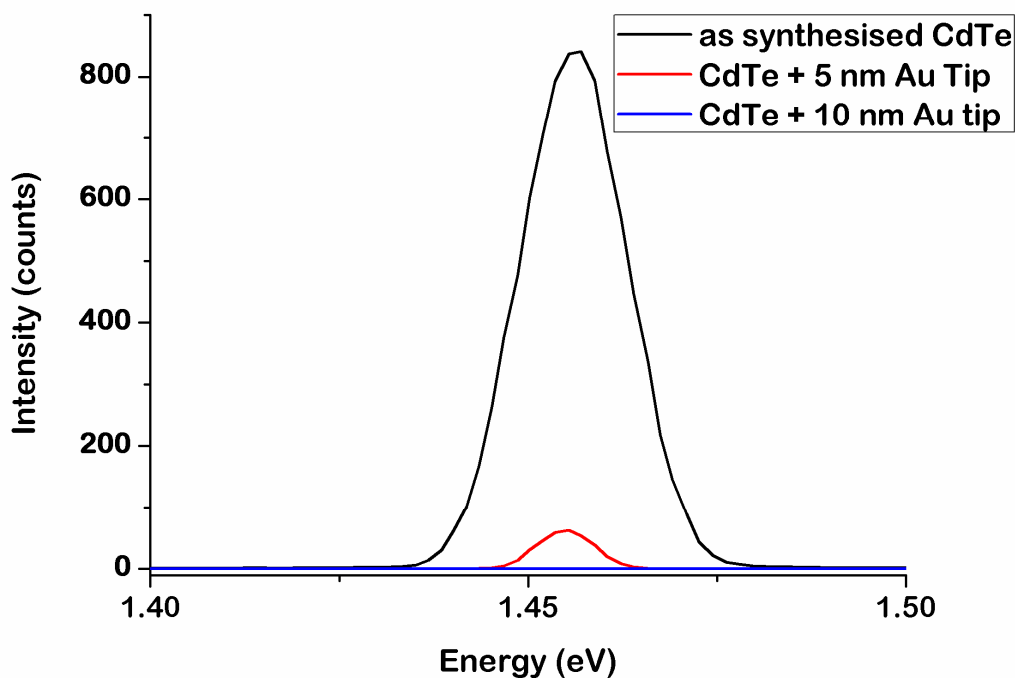

**Fig. S3.** PL data from as synthesised CdTe nanorods, CdTe nanorods with 5 nm tip and CdTe nanorods with ~ 10 nm gold tip, similar to those images in Fig. 3a and 3b. As the size of gold in the sample increases the emission decreases and disappears for Au tip greater than 10 nm.

| Scherrer Analysis |                                 |                                 |                                |
|-------------------|---------------------------------|---------------------------------|--------------------------------|
|                   | CdSe                            | CdS                             | CdTe                           |
| Sample 1          | 10.2 (corresponding to Fig. 1b) | 10.6 (corresponding to Fig. 2b) | 4.2 (corresponding to Fig. 3a) |
| Sample 2          | 38.2 (corresponding to Fig. 1c) |                                 | 9.1 (corresponding to Fig. 3b) |

**Table S3.** Scherrer analysis of Au peaks from XRD analysis
